# Supplementary material for: Pharmacy Technicians’ Willingness to Perform Emerging Tasks in Community Practice
Source: MDPI journal article supplement (doi:10.3390/pharmacy6040113), 2018-10-12
Supplement: s1 [file s1]

# Formatted Survey Questions

## 2017 National Pharmacy Technicians Survey on Emerging Tasks

### Start of Block: Intro

Intro

Welcome to the 2017 National Pharmacy Technicians Survey on Emerging Tasks. We value your professional opinion and would appreciate it if you would take a few minutes to complete this short survey. Please click the NEXT button to take the survey.

### End of Block: Intro

NEXT >>

### Start of Block: Block1-Screening [response Q1(1) continues; Q1(2) – Q1(6) goes to Q2-S]

Q1 Please check the response that best matches your current employment status.

- ☐ Currently employed as a pharmacy technician. (1)
- ☐ Employed in a health or pharmacy-related field or position, but not functioning as a pharmacy technician. (2)
- ☐ Retired. (3)
- ☐ Unemployed - Seeking employment. (4)
- ☐ Unemployed - Not seeking employment. (5)
- ☐ Other - Please specify: (6) \_\_\_\_\_

### End of Block: Block1-Screening

<<BACK

NEXT >>

### Start of Block: Block2

Q2 Are you currently certified as a pharmacy technician?

○ Yes (1)

○ No (0)

Q3 Please check the ONE item that best describes your primary place of employment.

**[Q3(1) - Q3(6) are community-based.]**

○ Independent community pharmacy (fewer than 4 stores under same ownership) (1)

○ Large chain community pharmacy (>50 units under same ownership, e.g., CVS, Walgreens) (3)

○ Supermarket pharmacy (5)

○ Government hospital/health system - INPATIENT (7)

○ Non-government hospital/health system - INPATIENT (9)

○ Specialty drug pharmacy (11)

○ Nursing home/Long-term care (13)

○ Ambulatory care (e.g., medical clinic, office-based practice, non-dispensing pharmacy) (15)

○ Pharmaceutical industry (17)

○ Small chain community pharmacy (4 to 50 stores under the same ownership) (2)

○ Mass merchandiser, e.g., Costco, Target, Wal-Mart) (4)

○ Clinic-based pharmacy (licensed pharmacy located in or near a clinic) (6)

○ Government hospital/health system - OUTPATIENT (8)

○ Non-government hospital/health system - OUTPATIENT (10)

○ Pharmacy benefit administration (e.g., PBM, managed care) (12)

○ Mail service pharmacy (14)

○ Pharmacy technician training program (e.g., vocational school, community college) (16)

○ Other organization - please specify: (18)

**[No BACK Button on this page is intentional]**

**End of Block: Block2**

**Start of Block: Block3**

**NEXT >>**

Q4 In which state is your primary employment? (Please select from the drop down list.)

▼ AL, Alabama (1) ... WY, Wyoming (50)

Q5 What is the population of the community in which your primary employment is located?

- Less than 10,000 (Rural/Small Community) (1)
- 10,000 - 49,999 (Small Metro) (2)
- 50,000 - 99,999 (Metro) (3)
- 100,000 or more (Large Metro) (4)

Q6 How many years have you worked as a pharmacy technician? (round to nearest whole number)

\_\_\_\_\_ years (1)

Q7 How many years have you worked for your current employer?

\_\_\_\_\_ years (1)

Q8 Do you work full time or part time?

- Full time (greater than 30 hours per week) (3)
- Part time (20 - 30 hours per week) (2)
- Part time (less than 20 hours per week) (1)

82 Q9 Indicate which of the following best describes your PRIMARY method of training to work as a  
83 pharmacy technician?

- 84     ○ On-the-job training from my employer, unaccredited (1)
- 85     ○ Self-guided training using books and online resources (2)
- 86     ○ Structured training program from my employer, unaccredited (3)
- 87     ○ Structured training program from my employer, ASHP/ACPE accredited (4)
- 88     ○ Standalone training program (e.g. vocational school, community college), unaccredited  
89 (5)
- 90     ○ Standalone training program (e.g. vocational school, community college), ASHP/ACPE  
91 accredited (6)

92 **End of Block: Block3**  
93 



94 **Start of Block: Block4**

95 Q10 Please indicate your level of involvement for each activity listed below during a typical work  
96 week.

|                                                                                                                 | Not at all<br>Involved<br>(1) | Somewhat<br>Involved<br>(2) | Regularly<br>Involved<br>(3) |
|-----------------------------------------------------------------------------------------------------------------|-------------------------------|-----------------------------|------------------------------|
| Receive prescription orders (Q10_1)                                                                             | <input type="radio"/>         | <input type="radio"/>       | <input type="radio"/>        |
| Collect and communicate patient specific information (Q10_2)                                                    | <input type="radio"/>         | <input type="radio"/>       | <input type="radio"/>        |
| Assess prescription for completeness, accuracy, authenticity,<br>legality and reimbursement eligibility (Q10_3) | <input type="radio"/>         | <input type="radio"/>       | <input type="radio"/>        |
| Process a prescription order (Q10_4)                                                                            | <input type="radio"/>         | <input type="radio"/>       | <input type="radio"/>        |
| Provide medication to patient/patient's representative (Q10_5)                                                  | <input type="radio"/>         | <input type="radio"/>       | <input type="radio"/>        |
| Direct patient to pharmacist for counseling (Q10_6)                                                             | <input type="radio"/>         | <input type="radio"/>       | <input type="radio"/>        |
| Identify pharmaceuticals and supplies to be ordered and manage<br>inventory (Q10_7)                             | <input type="radio"/>         | <input type="radio"/>       | <input type="radio"/>        |
| Use and maintain automated and point-of-care dispensing<br>technology (Q10_8)                                   | <input type="radio"/>         | <input type="radio"/>       | <input type="radio"/>        |
| Communicate with third party payers to determine coverage for<br>products and services (Q10_9)                  | <input type="radio"/>         | <input type="radio"/>       | <input type="radio"/>        |
| Perform final prescription verification during dispensing<br>(Q10_10)                                           | <input type="radio"/>         | <input type="radio"/>       | <input type="radio"/>        |
| Take prescription order from physician over the telephone<br>(Q10_11)                                           | <input type="radio"/>         | <input type="radio"/>       | <input type="radio"/>        |
| Transfer a prescription to another pharmacy (Q10_12)                                                            | <input type="radio"/>         | <input type="radio"/>       | <input type="radio"/>        |
| Administer a vaccination to a patient (Q10_13)                                                                  | <input type="radio"/>         | <input type="radio"/>       | <input type="radio"/>        |
| Draw a blood sample from a patient (finger stick) (Q10_14)                                                      | <input type="radio"/>         | <input type="radio"/>       | <input type="radio"/>        |
| Collect patient medication history from patient (Q10_15)                                                        | <input type="radio"/>         | <input type="radio"/>       | <input type="radio"/>        |
| Call patient prior to medication synchronization to clarify<br>medications to be filled (Q10_16)                | <input type="radio"/>         | <input type="radio"/>       | <input type="radio"/>        |
| Conduct medication reconciliation after patient is discharged<br>from hospital (Q10_17)                         | <input type="radio"/>         | <input type="radio"/>       | <input type="radio"/>        |
| Prepare vaccination for administration by pharmacist (Q10_18)                                                   | <input type="radio"/>         | <input type="radio"/>       | <input type="radio"/>        |
| Document pharmacy care in patient records (Q10_19)                                                              | <input type="radio"/>         | <input type="radio"/>       | <input type="radio"/>        |
| Call prescriber for clarification of electronic or written<br>prescription order (Q10_20)                       | <input type="radio"/>         | <input type="radio"/>       | <input type="radio"/>        |

Obtain patient vital signs (blood pressure, heart rate,  
temperature) (Q10\_21)

☐ ☐ ☐

**End of Block: Block4**

<<BACK

NEXT >>

**Start of Block: Block5**

Q11 Please rate your willingness to perform each of the following emerging tasks as a community  
pharmacy technician.

|                                                                                                 | Unwilling<br>(1)      | Slightly<br>Willing<br>(2) | Moderately<br>Willing (3) | Very<br>Willing<br>(4) |
|-------------------------------------------------------------------------------------------------|-----------------------|----------------------------|---------------------------|------------------------|
| Perform final prescription verification during<br>dispensing (Q11_1)                            | <input type="radio"/> | <input type="radio"/>      | <input type="radio"/>     | <input type="radio"/>  |
| Take prescription order from physician over the<br>telephone (Q11_2)                            | <input type="radio"/> | <input type="radio"/>      | <input type="radio"/>     | <input type="radio"/>  |
| Transfer a prescription to another pharmacy (Q11_3)                                             | <input type="radio"/> | <input type="radio"/>      | <input type="radio"/>     | <input type="radio"/>  |
| Administer a vaccination to a patient (Q11_4)                                                   | <input type="radio"/> | <input type="radio"/>      | <input type="radio"/>     | <input type="radio"/>  |
| Draw a blood sample from a patient (finger stick)<br>(Q11_5)                                    | <input type="radio"/> | <input type="radio"/>      | <input type="radio"/>     | <input type="radio"/>  |
| Collect patient medication history from patient<br>(Q11_6)                                      | <input type="radio"/> | <input type="radio"/>      | <input type="radio"/>     | <input type="radio"/>  |
| Call patient prior to medication synchronization to<br>clarify medications to be filled (Q11_7) | <input type="radio"/> | <input type="radio"/>      | <input type="radio"/>     | <input type="radio"/>  |
| Conduct medication reconciliation after patient is<br>discharged from hospital (Q11_8)          | <input type="radio"/> | <input type="radio"/>      | <input type="radio"/>     | <input type="radio"/>  |
| Prepare vaccination for administration by<br>pharmacist (Q11_9)                                 | <input type="radio"/> | <input type="radio"/>      | <input type="radio"/>     | <input type="radio"/>  |
| Document pharmacy care in patient records (Q11_10)                                              | <input type="radio"/> | <input type="radio"/>      | <input type="radio"/>     | <input type="radio"/>  |
| Call prescriber for clarification of electronic or<br>written prescription order (Q11_11)       | <input type="radio"/> | <input type="radio"/>      | <input type="radio"/>     | <input type="radio"/>  |
| Obtain patient vital signs (blood pressure, heart rate,<br>temperature) (Q11_12)                | <input type="radio"/> | <input type="radio"/>      | <input type="radio"/>     | <input type="radio"/>  |

**End of Block: Block5**

<<BACK

NEXT >>

**Start of Block: Block6**

105 Q12 Please rate your willingness to complete additional training and/or additional certifications in  
 106 order to perform these more advanced emerging tasks.

|                                                                                              | Unwilling<br>(1)      | Slightly<br>Willing<br>(2) | Moderately<br>Willing (3) | Very<br>Willing<br>(4) |
|----------------------------------------------------------------------------------------------|-----------------------|----------------------------|---------------------------|------------------------|
| Perform final prescription verification during dispensing (Q12_1)                            | <input type="radio"/> | <input type="radio"/>      | <input type="radio"/>     | <input type="radio"/>  |
| Take prescription order from physician over the telephone (Q12_2)                            | <input type="radio"/> | <input type="radio"/>      | <input type="radio"/>     | <input type="radio"/>  |
| Transfer a prescription to another pharmacy (Q12_3)                                          | <input type="radio"/> | <input type="radio"/>      | <input type="radio"/>     | <input type="radio"/>  |
| Administer a vaccination to a patient (Q12_4)                                                | <input type="radio"/> | <input type="radio"/>      | <input type="radio"/>     | <input type="radio"/>  |
| Draw a blood sample from a patient (finger stick) (Q12_5)                                    | <input type="radio"/> | <input type="radio"/>      | <input type="radio"/>     | <input type="radio"/>  |
| Collect patient medication history from patient (Q12_6)                                      | <input type="radio"/> | <input type="radio"/>      | <input type="radio"/>     | <input type="radio"/>  |
| <div> <div>&lt;&lt;BACK</div> <div>NEXT &gt;&gt;</div> </div>                                |                       |                            |                           |                        |
| Call patient prior to medication synchronization to clarify medications to be filled (Q12_7) | <input type="radio"/> | <input type="radio"/>      | <input type="radio"/>     | <input type="radio"/>  |
| Conduct medication reconciliation after patient is discharged from hospital (Q12_8)          | <input type="radio"/> | <input type="radio"/>      | <input type="radio"/>     | <input type="radio"/>  |
| Prepare vaccination for administration by pharmacist (Q12_9)                                 | <input type="radio"/> | <input type="radio"/>      | <input type="radio"/>     | <input type="radio"/>  |
| Document pharmacy care in patient records (Q12_10)                                           | <input type="radio"/> | <input type="radio"/>      | <input type="radio"/>     | <input type="radio"/>  |
| Call prescriber for clarification of electronic or written prescription order (Q12_11)       | <input type="radio"/> | <input type="radio"/>      | <input type="radio"/>     | <input type="radio"/>  |
| Obtain patient vital signs (blood pressure, heart rate, temperature) (Q12_12)                | <input type="radio"/> | <input type="radio"/>      | <input type="radio"/>     | <input type="radio"/>  |

107 **End of Block: Block6**

<<BACK

NEXT >>

109 **Start of Block: Block7**



110 Q13 Please rate your level of agreement with each of the following statements in regard to pharmacy  
111 technicians working in your pharmacy.

[illegible]

My fellow pharmacy staff  
would be supportive of  
implementing a new  
service in the pharmacy.

(Q13\_9)

☐ ☐ ☐ ☐ ☐ ☐ ☐

At my workplace the  
managers would be  
supportive when  
technicians are performing  
new tasks. (Q13\_10)

☐ ☐ ☐ ☐ ☐ ☐ ☐

There is enough time in my  
current workday to  
complete additional tasks  
and responsibilities.

(Q13\_11)

☐ ☐ ☐ ☐ ☐ ☐ ☐

**End of Block: Block7**

<<BACK

NEXT >>

**Start of Block: Block8-Demographics\_CE**

Q14CE What is your gender identity?

- ☐ Male (1)
- ☐ Female (2)
- ☐ Other (0)

Q15CE What is your age?

\_\_\_\_\_ years (1)

Q16CE Please provide any comments you have about emerging tasks for pharmacy technicians or this survey.

*Essay sized text entry*

QEnd/CE You have reached the end of the survey. Thank you for taking time to contribute.

You may use the <<BACK and NEXT>> buttons to review your answers. If you are satisfied with your answers, please click the SUBMIT button to record your responses.

**End of Block: Block8-Demographics\_CE**

<<BACK

SUBMIT

**Thank you message returned**

Thank you for your time spent taking the survey and thank you  
for your service to the pharmacy profession.

**SCREENED-OUT**

**Start of Block: Block9-End/Screened-Out**

Q2-S How many years did you work as a pharmacy technician?

\_\_\_\_\_ years (1)

Q3-S What is your gender identity?

- ☐ Male (1)
- ☐ Female (2)
- ☐ Other (0)

Q4-S What is your age?

\_\_\_\_\_ years (1)

**End of Block: Block9-End/Screened-Out**

NEXT

**Thank You message returned for Screened-Out**

Thank you for your time spent taking the survey and thank you  
for your service to the pharmacy profession.
